# Supplementary material for: Global study of holistic morphological effectors in the budding yeast Saccharomyces cerevisiae
Source: PubMed Central journal article supplement (PMC5819264; doi:10.1186/s12864-018-4526-z), 2018-02-20

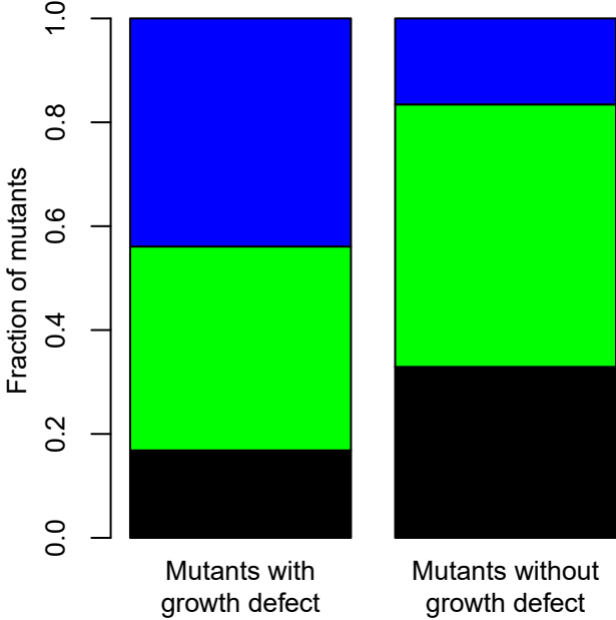

Supplement: 12864_2018_4526_MOESM6_ESM.pdf [file 12864_2018_4526_MOESM6_ESM.pdf]
