# Supplementary material for: Global study of holistic morphological effectors in the budding yeast Saccharomyces cerevisiae
Source: PubMed Central journal article supplement (PMC5819264; doi:10.1186/s12864-018-4526-z), 2018-02-20

Euclidean distance

5 10 15 20 25 30

Other  
SSDs

Heteromer  
SSDs

Singletons

Heteromer  
ohnologs

Other  
ohnologs

\*

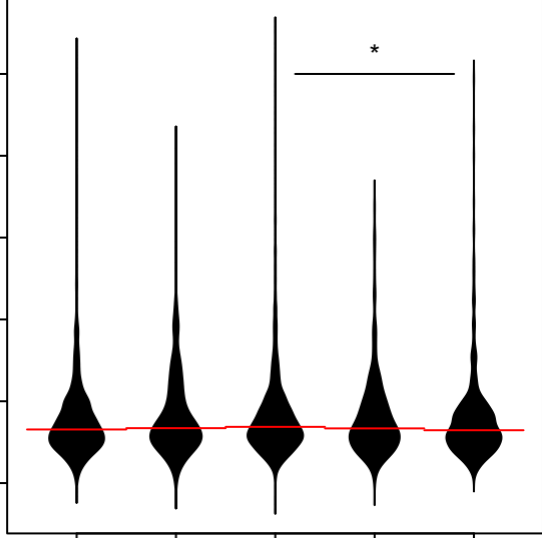

Supplement: 12864_2018_4526_MOESM9_ESM.pdf [file 12864_2018_4526_MOESM9_ESM.pdf]
